# Supplementary material for: Tailoring the lateral size of two-dimensional silicon nanomaterials to produce highly stable and efficient deep-blue emissive silicene-like quantum dots
Source: Royal Society of Chemistry journal article supplement (doi:10.1039/d1tc02043a), 2021-01-01
Supplement: d1tc02043a1.pdf [file d1tc02043a1.pdf]

## Electronic Supplementary Information

### **Tailoring the Lateral Size of Two-Dimensional Silicon Nanomaterials to Produce Highly Stable and Efficient Deep-Blue Emissive Silicene-Like Quantum Dots**

Hongjin Li, ‡<sup>a</sup> Yang Wang, ‡<sup>a</sup> Xingliang Dai, \*<sup>ab</sup> Yun Gao,<sup>a</sup> Guochao Lu,<sup>a</sup> Zhishan Fang,<sup>a</sup>  
Haiping He,<sup>ab</sup> Jingyun Huang, \*<sup>ab</sup> and Zhizhen Ye \*<sup>ab</sup>

<sup>a</sup> State Key Laboratory of Silicon Materials, School of Materials Science and Engineering, Zhejiang University, Hangzhou 310027, P. R. China. E-mail: shanfeng@zju.edu.cn; huangjy@zju.edu.cn; yezz@zju.edu.cn

<sup>b</sup> ZJU-WZ Novel Materials Science & Technology Innovation Center, Institute of Wenzhou, Zhejiang University, Wenzhou 325006, P. R. China.

‡ These authors contributed equally to this work.

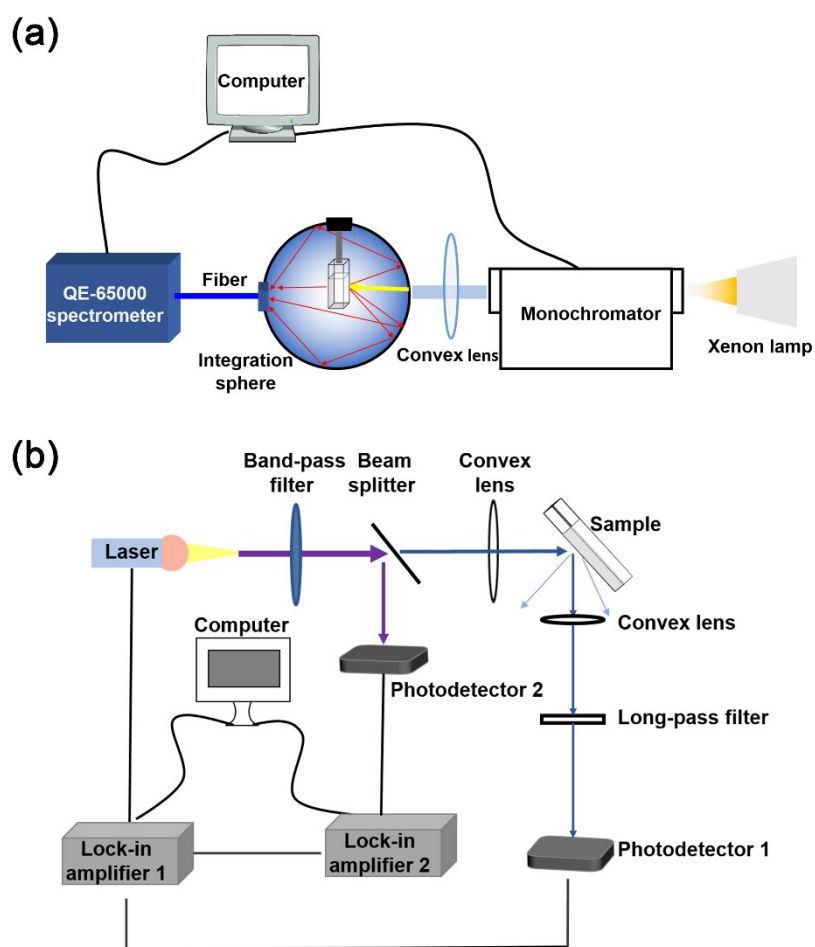

**Fig. S1.** Schematic diagram of PL QY measurement systems. a) The absolute PL QY measurement system. b) The excitation density-dependent PL QY measurement system.

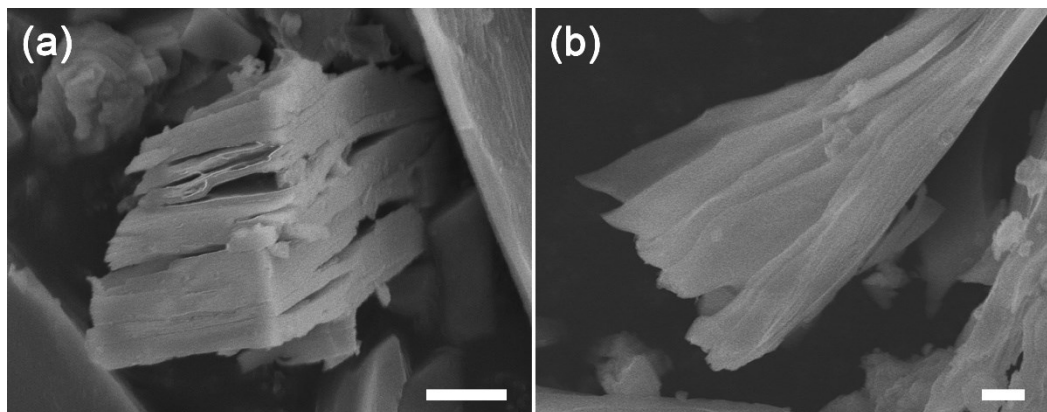

**Fig. S2.** SEM morphology of a) the compact layered structure of  $\text{CaSi}_2$  and b) the loosely-stacked sheets of the exfoliated siloxene. Scale bar: 1  $\mu\text{m}$ .

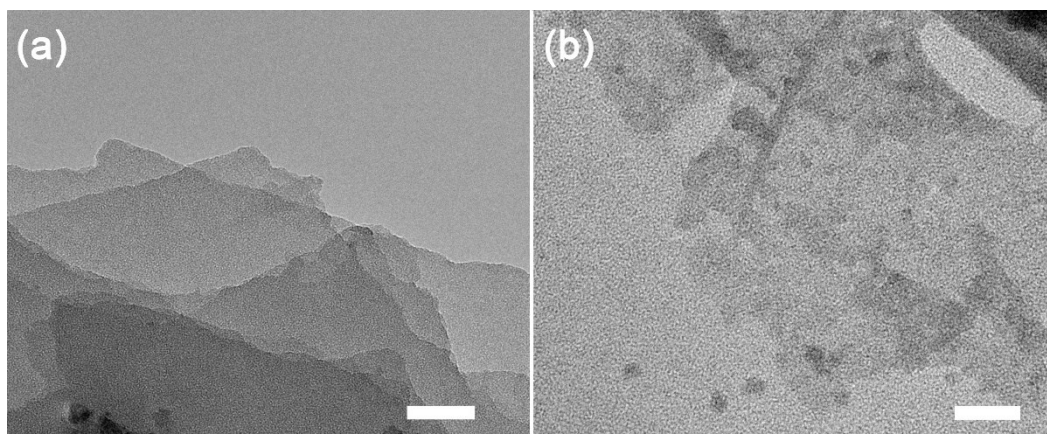

**Fig. S3.** TEM images of a) the siloxene and b) the HF etched samples, showing morphology conversion from the stacked sheets to the smaller and thinner flakes. Scale bar: 50 nm.

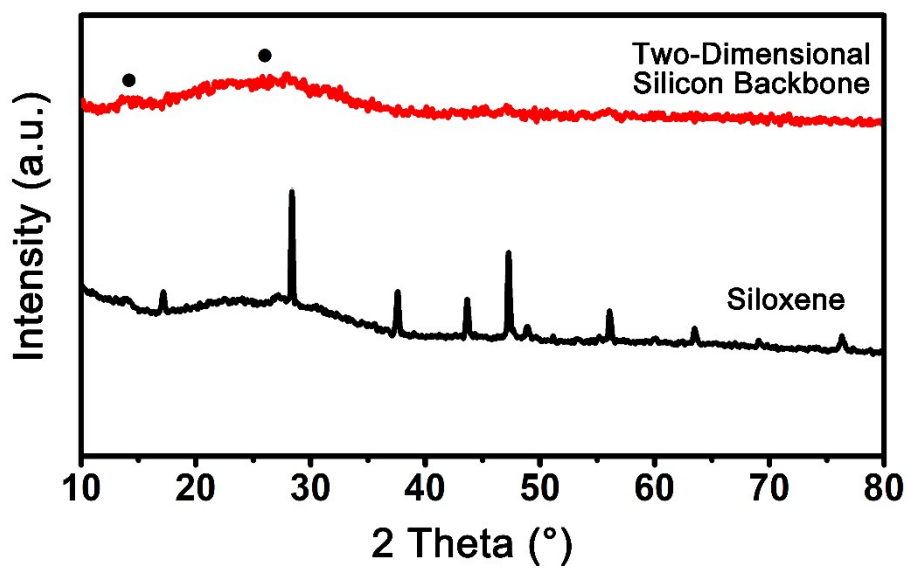

**Fig. S4.** XRD patterns of the as-prepared siloxene and the obtained two-dimensional silicon backbone after HF etching.

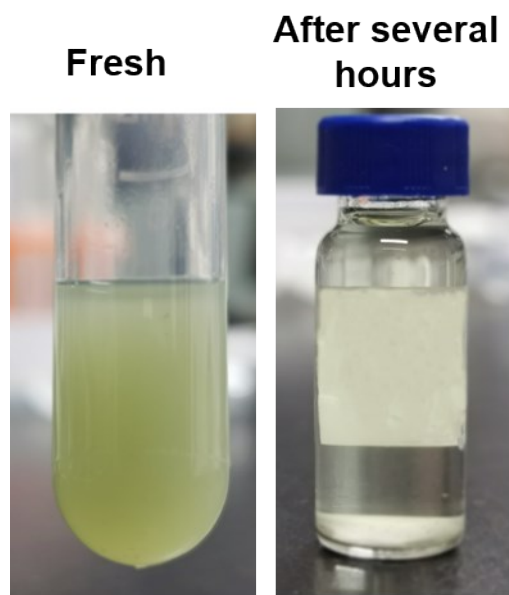

**Fig. S5.** Photographs of the colloidal solution of the obtained two-dimensional silicon backbone before ultrasonic, showing the precipitate at the bottom after storage for several hours.

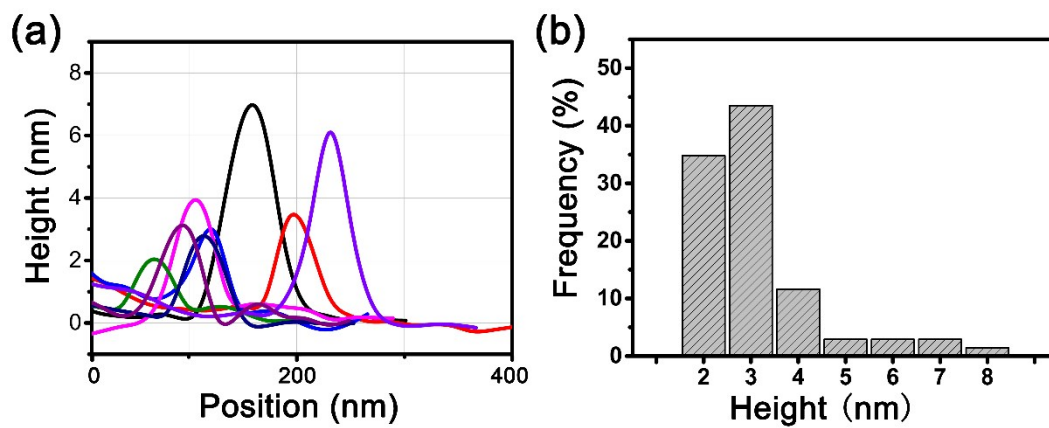

**Fig. S6.** a) Height profiles of several typical dots. b) Histogram of heights distribution of the silicene-like QDs.

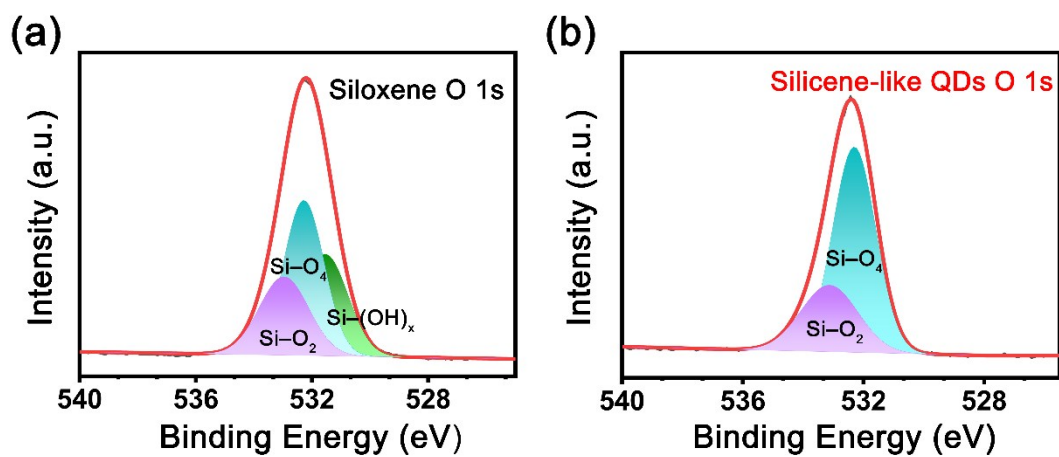

**Fig. S7.** High-resolution XPS O 1s core level spectra of a) the siloxene and b) the silicene-like QDs.



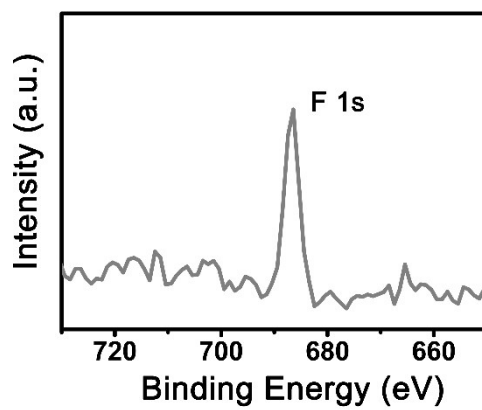

**Fig. S8.** XPS F 1s core level spectrum of the silicene-like QDs.

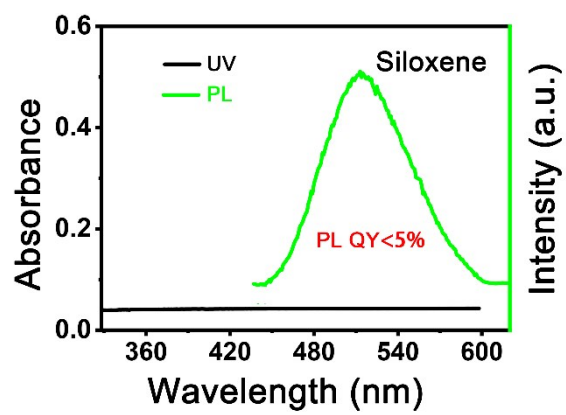

**Fig. S9.** UV–Vis absorption and PL spectrum of the exfoliated siloxene.

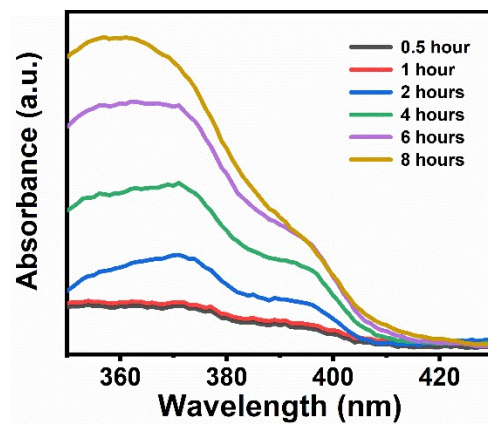

**Fig. S10.** The absorbance of silicene-like QDs under different ultrasonic time.

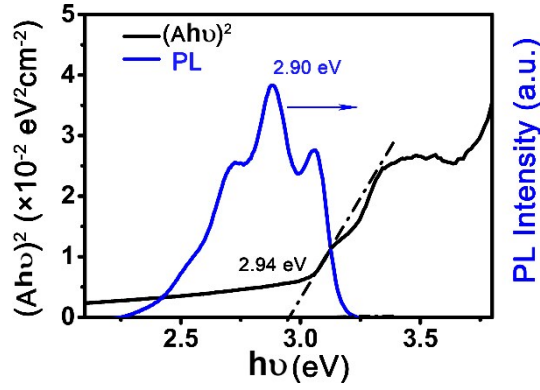

**Fig. S11.** Plots of  $(Ah\nu)^2$  versus the photon energy calculated from the absorbance measurement (black) and PL spectra of the silicene-like QDs (blue).

Based on the UV–Vis absorption spectrum shown in Fig. 4a, the optical bandgap  $E_g$  is obtained according to the following equations:

$$\alpha h\nu = B(h\nu - E_g)^{m\#} \quad (1)$$

Where  $\alpha$  is the absorption coefficient values, B is a constant,  $h\nu$  is the photon energy and  $E_g$  represents the bandgap energy of the materials. m depends on the nature of the transition. <sup>S1, S2</sup>

According to Lambert Beer's law:

$$A = abc \quad (2)$$

Where A is the absorbance, b is the thickness and c is the concentration of solutions, bc is a

constant. If  $B_1 = \left(\frac{B}{bc}\right)^{1/m}$ , thus,

$$(Ah\nu)^{\frac{1}{m}} = B_1(h\nu - E_g) \quad (3)$$

For direct transitions, m is 1/2. Therefore the  $E_g$  of silicene-like QDs is calculated by extrapolating the linear portion of the plot  $(Ah\nu)^2$  versus  $h\nu$  to A = 0. <sup>S3, S4</sup> Consequently, it shows a direct bandgap of 2.94 eV, which is close to the PL peak energy of 2.90 eV.

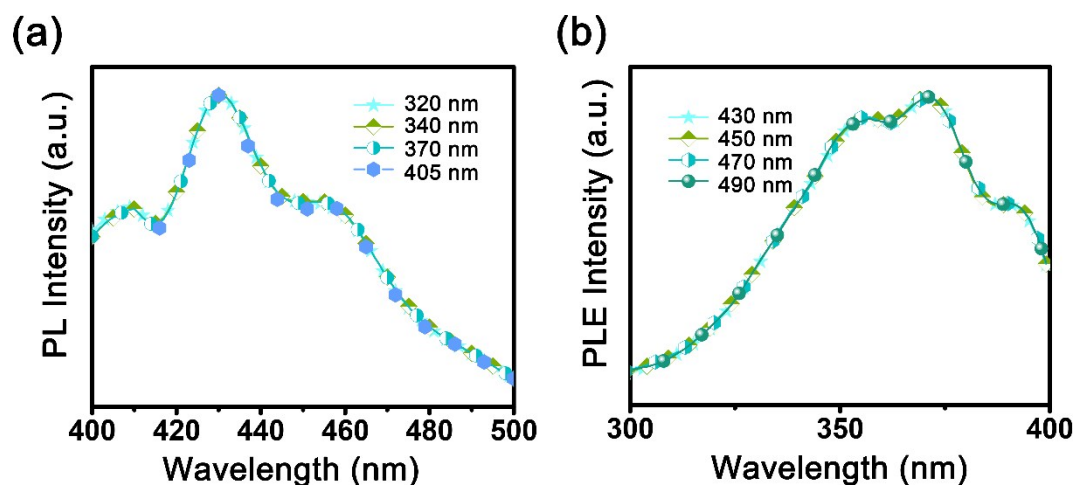

**Fig. S12.** a) PL spectra of the silicene-like QDs measured at an excitation wavelength ranging from 320 nm to 405 nm. b) PLE spectra of the silicene-like QDs collected a wavelength ranging from 430–490 nm.

**Table S1.** Calculated ratio of O/Si elements from XPS analysis of the siloxene and the silicene-like QDs.

| Name              | Element | Atomic (%) | O/Si |
|-------------------|---------|------------|------|
| Siloxene          | O 1s    | 48.45      | 1.43 |
|                   | Si 2p   | 33.87      |      |
| Silicene-like QDs | O 1s    | 34.04      | 0.81 |
|                   | Si 2p   | 41.97      |      |

## Reference

- S1 SM. Ray, K. Jana, N. R. Bandyopadhyay, S. M. Hossain, D. Navarro-Urrios, P. P. Chattyopadhyay and M. A. Green, *Solid State Commun.*, 2009, 149, 352-356.
- S2 J. Torrent and V. Barrón, *Encyclopedia of Surface and Colloid Science*, 2002, 1.
- S3 F. Bouaichi, H. Saidi, A. Attaf, M. Othmane, L. Nadia, M. Nouadji, M. Poulain and S. Benramache, *Main Group Chem.*, 2015, 15, 57-66.
- S4 Z. Hai, L. Gao, Q. Zhang, x. Hongyan, D. Cui, Z. Zhang, D. Tsoukalas, J. Tang, S.-B. Yan and C. Xue, *Appl. Surf. Sci.*, 2015, 361.
